# Supplementary material
Source: publisher site journal article supplement (https://www.dovepress.com/article/446681)
Supplement: Supplementary file 1 [file get_supplementary_file.php]

Supplemental Table 1: Time analysis

| **Patient number** | **1** | **2** | **3** | **4** | **9** | **10** | **5** | **6** | **7** | **8** | **Mean** | **Median** |
| --- | --- | --- | --- | --- | --- | --- | --- | --- | --- | --- | --- | --- |
| Time intervals (days) |  |  |  |  |  |  |  |  |  |  |  |  |
| Fever to admission | 8 | 4 | 2 | 6 | 3 | 3 | 4 | 4 | 5 | 5 | 4.40 | 4 |
| Admission to therapy | 2 | 1 | 6 | 2 | 3 | 0 | 1 | 3 | 2 | 1 | 2.10 | 2 |
| Fever to treatment | 10 | 5 | 8 | 8 | 6 | 3 | 5 | 7 | 7 | 6 | 6.50 | 6.5 |
| Treatment to afebrile | NA | 2 | 2 | 1 | 9 | 1 | 1 | 1 | 4 | 7 | 3.11 | 2 |
| Treatment to discharge | NA | 18 | 14 | 6 | 12 | 8 | 8 | 7 | 14 | 6 | 10.33 | 8 |

Supplemental Table 2: Patient with Kawasaki disease

| **Patient number** | **8** |
| --- | --- |
| Sex | M |
| Age(Y) | 7.75 |
| Race | Arabic |
| Fever | Yes |
| Splenomegaly | Hepatomegaly |
| At least bicytopenia | Yes |
| ANC<1000/µL | 970 |
| Hgb<10/µL | 9.1 |
| PLT<100 x 103/µL | 87 |
| Triglycerides/fibrinogen | No |
| Triglycerides>265mg/dL | 230 |
| Fibrinogen<150 mg/dL | 350 |
| Ferritin (max)>500 ng/mL | Yes 947 |
| NK Function - Absent or very low | NA |
| Soluble IL2 Receptor (> 2000) | Yes/No 1990 |
| Hemophagocytosis | NA |
| Total HLH-2004 Criteria | 3-4/8 |
| Perforin expression |  |
| Liver functions abnormalities | Yes |
| ALT (13-45 U/L) | 29 |
| AST (7-46 U/L) | 51 |
| Bilirubin (0.3-1.2 mg/dL) | 0.7 |
| INR (0.8-1.2) | 1.1 |
| CNS |  |
| Markers of inflammation |  |
| ESR ≤ 20 mm/hr | 30 |
| CRP ≤ 0.5 mg/dL | 12.25 |
| Other organ involvement |  |
| **Infection** | None |
| **Genetic workup** | Not done |
| **Treatment** | IVIG |
| Length of stay (LOS) days | 7 |
| Alive/Dead | Alive |
| Follow-up (years) | 6.3 |
| Subsequent admissions | Elective coronary angiography |
| Subsequent major complications | Mild coronary disease |
| **Time intervals (days)** |  |
| Fever to admission | 5 |
| Admission to therapy | 1 |
| Fever to treatment | 6 |
| Treatment to afebrile | 7 |
| Treatment to discharge | 6 |

Yellow shaded text highlights HLH-2004 positive signs and laboratory data.
